# Supplementary material for: Mid‐life and late‐life vascular risk factor burden and neuropathology in old age
Source: PubMed Central journal article supplement (PMC6917310; doi:10.1002/acn3.50936), 2019-11-05

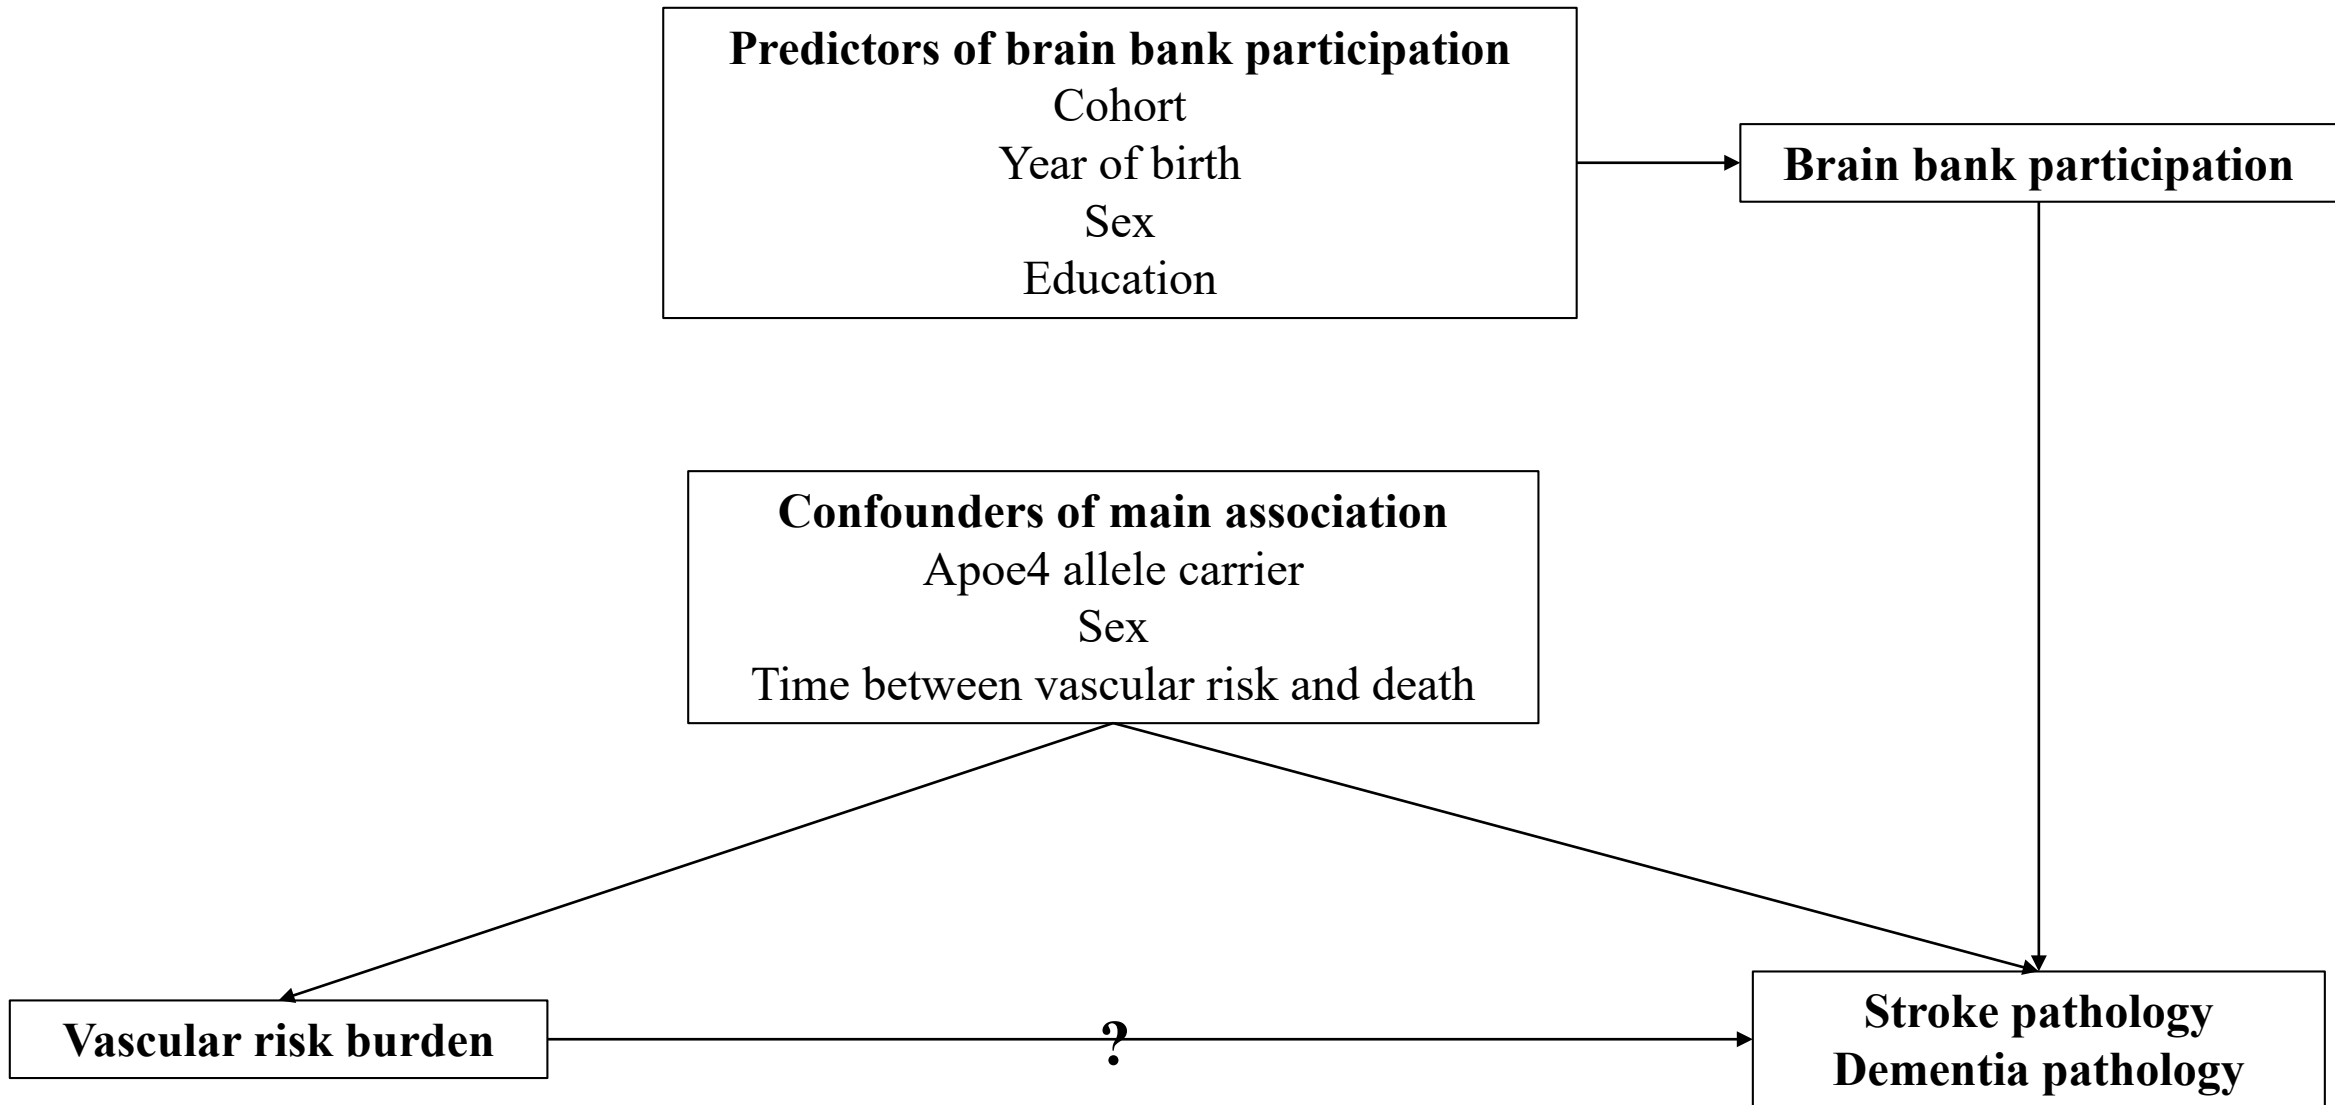

Supplement: ACN3-6-2403-s002.pdf [file ACN3-6-2403-s002.pdf]
